# Supplementary material for: Body Mass Index Trajectories During Young Adulthood and Incident Hypertension: A Longitudinal Cohort in Chinese Population
Source: PubMed Central journal article supplement — J Am Heart Assoc. 2019 Apr 10;8(8):e011937. doi: 10.1161/JAHA.119.011937 (PMC6507204; doi:10.1161/jaha.119.011937), 2019-04-10

# **Supplemental Material**

**Table S1. Digit preference of blood pressure (BP) measurements.**

| End digit | Proportions of end digit % |              |
|-----------|----------------------------|--------------|
|           | Systolic BP                | Diastolic BP |
| 0         | 17.09                      | 16.46        |
| 1         | 8.88                       | 9.04         |
| 2         | 9.04                       | 8.69         |
| 3         | 9.22                       | 9.10         |
| 4         | 8.71                       | 9.12         |
| 5         | 10.56                      | 11.26        |
| 6         | 9.11                       | 9.18         |
| 7         | 9.35                       | 8.92         |
| 8         | 8.90                       | 9.36         |
| 9         | 9.15                       | 8.88         |

**Table S2. Descriptive data of baseline and follow-up characteristics by incident hypertension at follow-up.**

| Variable               | Total<br>(n=3271) | Normotensives<br>(n=2886) | Hypertensives<br>(n=385) | P-value |
|------------------------|-------------------|---------------------------|--------------------------|---------|
| <b>Baseline</b>        |                   |                           |                          |         |
| Age, yr                | 28.7 (4.7)        | 28.8 (4.7)                | 28.3 (4.3)               | 0.075   |
| BMI, kg/m <sup>2</sup> | 22.4 (3.2)        | 22.2 (3.1)                | 23.3 (3.3)               | <0.001  |
| SBP, mmHg              | 114.4 (11.1)      | 113.9 (11.0)              | 118.1 (11.2)             | <0.001  |
| DBP, mmHg              | 72.0 (8.0)        | 71.5 (7.9)                | 75.6 (7.8)               | <0.001  |
| <b>Follow-up</b>       |                   |                           |                          |         |
| Age, yr                | 34.3 (4.6)        | 34.4 (4.6)                | 33.2 (4.3)               | <0.001  |
| BMI, kg/m <sup>2</sup> | 23.8 (3.4)        | 23.5 (3.3)                | 25.6 (3.4)               | <0.001  |
| SBP, mmHg              | 117.3 (14.1)      | 114.2 (11.2)              | 140.7 (11.2)             | <0.001  |
| DBP, mmHg              | 71.9 (10.5)       | 69.6 (8.4)                | 88.7 (9.5)               | <0.001  |
| Follow up years        | 5.6 (2.2)         | 5.7 (2.2)                 | 4.9 (1.8)                | <0.001  |
| Smoker, n (%)          | 685 (20.9)        | 561 (19.4)                | 124 (32.2)               | <0.001  |
| Drinker, n (%)         | 972 (29.7)        | 760 (26.3)                | 212 (55.1)               | <0.001  |

BMI=body mass index; SBP=systolic blood pressure;

DBP=diastolic blood pressure

**Table S3. Baseline characteristics of participants included and excluded.**

| Variable               | Excluded     | Included     | P-value |
|------------------------|--------------|--------------|---------|
| N                      | 28590        | 3271         |         |
| Age, year              | 29.86 (5.6)  | 28.7 (4.7)   | <0.001  |
| Males, n (%)           | 16042 (56.1) | 1712 (52.3)  | <0.001  |
| BMI, kg/m <sup>2</sup> | 23.4 (3.8)   | 22.4 (3.2)   | <0.001  |
| SBP, mmHg              | 117.6 (11.8) | 114.4 (11.1) | <0.001  |
| DBP, mmHg              | 72.0 (8.8)   | 72.0 (8.0)   | 0.742   |
| Smoker, n (%)          | 2229 (7.8)   | 455 (13.9)   | <0.001  |
| Drinker, n (%)         | 2280 (8.0)   | 641 (19.6)   | <0.001  |

BMI=body mass index; SBP=systolic blood pressure; DBP=diastolic blood pressure

**Table S4. Latent Class Growth Mixture Models (LCGMM) results of model fitting process.**

| No. Latent class | Polynomial degree | Log-Lik | BIC   | % Participants per class | Mean posterior probabilities | % Posterior probabilities > 70% |
|------------------|-------------------|---------|-------|--------------------------|------------------------------|---------------------------------|
| 1                | Linear            | -34904  | 69848 | 100                      | na                           | na                              |
|                  | Quadratic         | -34772  | 69600 | 100                      | na                           | na                              |
|                  | Cubic             | -34742  | 69556 | 100                      | na                           | na                              |
| 2                | Linear            | -34571  | 69215 | 34.52/ 65.48             | 0.83/ 0.90                   | 75.82/ 87.21                    |
|                  | Quadratic         | -34370  | 68837 | 34.97/ 65.03             | 0.84/ 0.90                   | 78.85/ 87.35                    |
|                  | Cubic             | -34338  | 68798 | 35.43/ 64.57             | 0.84/ 0.90                   | 78.60/ 87.12                    |
| 3                | Linear            | -34299  | 68703 | 38.34/ 3.76/ 57.90       | 0.79/ 0.83/ 0.87             | 75.52/ 76.42/ 87.12             |
|                  | Quadratic         | -34170  | 68477 | 2.20/ 35.22/ 62.58       | 0.82/ 0.81/ 0.87             | 79.17/ 76.56/ 86.17             |
|                  | Cubic             | -34131  | 68433 | 1.99/ 35.4/ 62.61        | 0.83/ 0.81/ 0.86             | 81.54/ 76.25/ 86.82             |
| 4                | Linear            | -34230  | 68597 | 6.14/ 2.87/ 48.7/ 42.28  | 0.79/ 0.83/ 0.87/ 0.79       | 67.66/ 72.34/ 83.11/ 73.97      |
|                  | Quadratic         | -34059  | 68297 | 1.90/ 7.52/ 46.99/ 43.6  | 0.82/ 0.81/ 0.87/ 0.80       | 75.81/ 67.89/ 83.28/ 73.84      |

|   |              |               |              |                                 |                               |                                   |
|---|--------------|---------------|--------------|---------------------------------|-------------------------------|-----------------------------------|
|   | <b>Cubic</b> | <b>-34029</b> | <b>68277</b> | <b>45.77/ 43.44/ 8.90/ 1.90</b> | <b>0.86/ 0.79/ 0.81/ 0.83</b> | <b>82.70/ 73.19/ 69.42/ 74.19</b> |
| 5 | Linear       | -34155        | 68480        | 3.33/ 1.86/ 4.49/ 49.43 /40.87  | 0.80/ 0.78/ 0.73/ 0.90/ 0.82  | 70.64/ 63.93/ 50.34/ 86.58/ 78.98 |
|   | Quadratic    | -33981        | 68180        | 43.14/ 8.13/ 0.89/ 45.58/ 2.26  | 0.80/ 0.80/ 0.83/ 0.86/ 0.82  | 74.63/ 68.80/ 72.41/ 81.96/ 74.32 |
|   | Cubic        | -34095        | 68456        | 7.73/ 46.13/ 42.13/ 2.57/ 1.41  | 0.79/ 0.77/ 0.83/ 0.83/ 0.79  | 68.38/ 71.04/ 78.61/ 73.81/ 67.39 |

---

No. Latent class: latent class number of the model; Log-Lik: the maximum Log-Likelihood; BIC: the Bayesian information Criterion;

% Participants per class: proportion of participants per class; The best fitting model is highlighted in bold characters. (na: not applicable).

**Table S5. Parameter estimates for the best fitting 4-class cubic Latent Class Growth Mixture Model.**

|                     | Intercept (se)*         | Linear (se)   | Quadratic (se) | Cubic (se)                                      |
|---------------------|-------------------------|---------------|----------------|-------------------------------------------------|
| <b>Fixed effect</b> |                         |               |                |                                                 |
| Low-stable          | 21.3 (0.443)            | 0.077 (0.012) | 0.002 (0.001)  | 4.1x10 <sup>-4</sup> (1.5 x10 <sup>-4</sup> )   |
| Medium-increasing   | 25.4 (0.472)            | 0.176 (0.013) | -0.010 (0.001) | 4.2 x10 <sup>-4</sup> (1.9 x10 <sup>-4</sup> )  |
| High-increasing     | 28.1 (0.519)            | 0.095 (0.025) | -0.022 (0.003) | 1.8 x10 <sup>-3</sup> (3.4 x10 <sup>-4</sup> )  |
| Sharp-increasing    | 25.8 (na <sup>†</sup> ) | 1.905 (0.091) | 0.047 (0.015)  | -3.7 x10 <sup>-3</sup> (1.3 x10 <sup>-3</sup> ) |

**Random effects: variance-covariance matrix**

$$\sigma_{int}^2 = 2.26$$

$$\sigma_{linear\ slope}^2 = 0.016$$

$$\sigma_{quadratic\ slope}^2 < 0.001$$

$$\sigma_{cubic\ slope}^2 < 0.001$$

$$\sigma_{error}^2 = 1.00$$

se=standard error

\*: Intercept interpreted as the expected level of BMI in kg/m<sup>2</sup> at 31 years of age (centering to the mean age of the sample)

†: The se of the intercept of this group was not estimated.

**Table S6. Model-estimated levels and linear slopes of BMI in means (SD) by incident hypertension at follow-up.**

| Age (yr) | BMI Level (kg/m <sup>2</sup> ) |              |                 | BMI Slope (kg/m <sup>2</sup> /yr) |             |                 |
|----------|--------------------------------|--------------|-----------------|-----------------------------------|-------------|-----------------|
|          | NTN                            | HTN          | <i>P</i> -value | NTN                               | HTN         | <i>P</i> -value |
| 20       | 21.93 (1.69)                   | 21.53 (2.09) | < 0.001         | 0.40 (0.34)                       | 0.52 (0.45) | < 0.001         |
| 21       | 22.31 (1.71)                   | 22.04 (2.23) | 0.005           | 0.37 (0.29)                       | 0.49 (0.36) | < 0.001         |
| 22       | 22.66 (1.76)                   | 22.51 (2.36) | 0.147           | 0.33 (0.26)                       | 0.46 (0.28) | < 0.001         |
| 23       | 22.97 (1.83)                   | 22.96 (2.44) | 0.891           | 0.30 (0.23)                       | 0.43 (0.24) | < 0.001         |
| 24       | 23.25 (1.89)                   | 23.37 (2.49) | 0.265           | 0.27 (0.20)                       | 0.40 (0.22) | < 0.001         |
| 25       | 23.51 (1.96)                   | 23.76 (2.49) | 0.021           | 0.24 (0.19)                       | 0.38 (0.24) | < 0.001         |
| 26       | 23.74 (2.02)                   | 24.13 (2.47) | < 0.001         | 0.22 (0.18)                       | 0.36 (0.28) | < 0.001         |
| 27       | 23.94 (2.07)                   | 24.48 (2.43) | < 0.001         | 0.20 (0.18)                       | 0.34 (0.32) | < 0.001         |
| 28       | 24.13 (2.13)                   | 24.80 (2.40) | < 0.001         | 0.18 (0.19)                       | 0.32 (0.36) | < 0.001         |
| 29       | 24.30 (2.18)                   | 25.11 (2.39) | < 0.001         | 0.16 (0.20)                       | 0.30 (0.40) | < 0.001         |
| 30       | 24.46 (2.23)                   | 25.41 (2.43) | < 0.001         | 0.15 (0.20)                       | 0.29 (0.44) | < 0.001         |
| 31       | 24.60 (2.29)                   | 25.69 (2.54) | < 0.001         | 0.14 (0.21)                       | 0.28 (0.47) | < 0.001         |
| 32       | 24.74 (2.36)                   | 25.96 (2.73) | < 0.001         | 0.13 (0.22)                       | 0.27 (0.50) | < 0.001         |
| 33       | 24.87 (2.44)                   | 26.22 (2.99) | < 0.001         | 0.13 (0.23)                       | 0.26 (0.52) | < 0.001         |
| 34       | 25.00 (2.53)                   | 26.48 (3.31) | < 0.001         | 0.13 (0.23)                       | 0.26 (0.53) | < 0.001         |
| 35       | 25.13 (2.62)                   | 26.74 (3.68) | < 0.001         | 0.13 (0.23)                       | 0.26 (0.53) | < 0.001         |
| 36       | 25.26 (2.73)                   | 27.00 (4.08) | < 0.001         | 0.13 (0.23)                       | 0.26 (0.53) | < 0.001         |
| 37       | 25.40 (2.85)                   | 27.25 (4.50) | < 0.001         | 0.14 (0.23)                       | 0.26 (0.52) | < 0.001         |
| 38       | 25.54 (2.98)                   | 27.51 (4.94) | < 0.001         | 0.15 (0.22)                       | 0.26 (0.51) | < 0.001         |
| 39       | 25.70 (3.11)                   | 27.78 (5.37) | < 0.001         | 0.17 (0.22)                       | 0.27 (0.49) | < 0.001         |
| 40       | 25.87 (3.24)                   | 28.05 (5.79) | < 0.001         | 0.18 (0.21)                       | 0.28 (0.46) | < 0.001         |

NTN = normotension; HTN = hypertension



Figure S1. Trajectories of body mass index by sex.

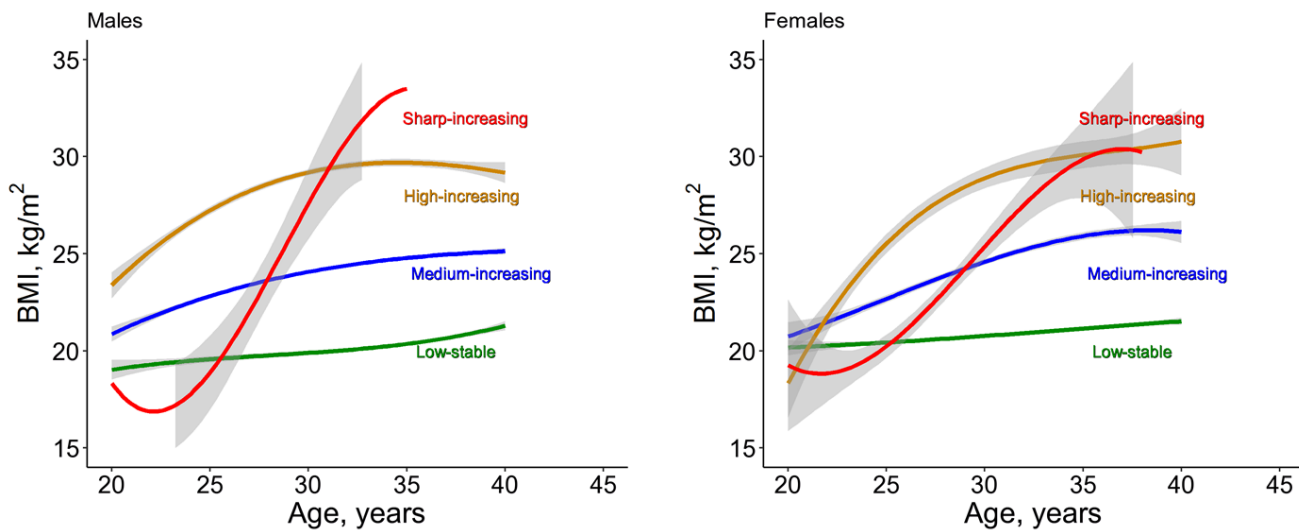

**Figure S2. Standardized odds ratio (OR) and 95% confidence interval (CI) of observed BMI levels for incident hypertension by age, adjusting for sex, smoking, alcohol drinking and baseline SBP.**

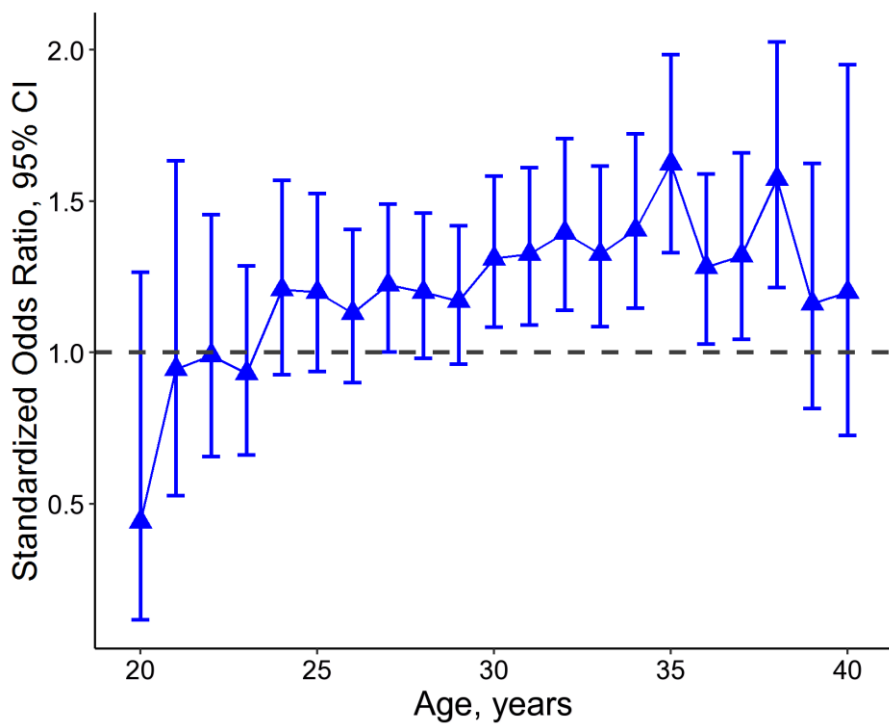

**Figure S3. Standardized odds ratio (OR) and 95% confidence interval (CI) of model-estimated levels and level-adjusted linear slopes of BMI from a four-group quadratic model by age for incident hypertension, adjusting for sex, smoking, alcohol drinking and baseline SBP.**

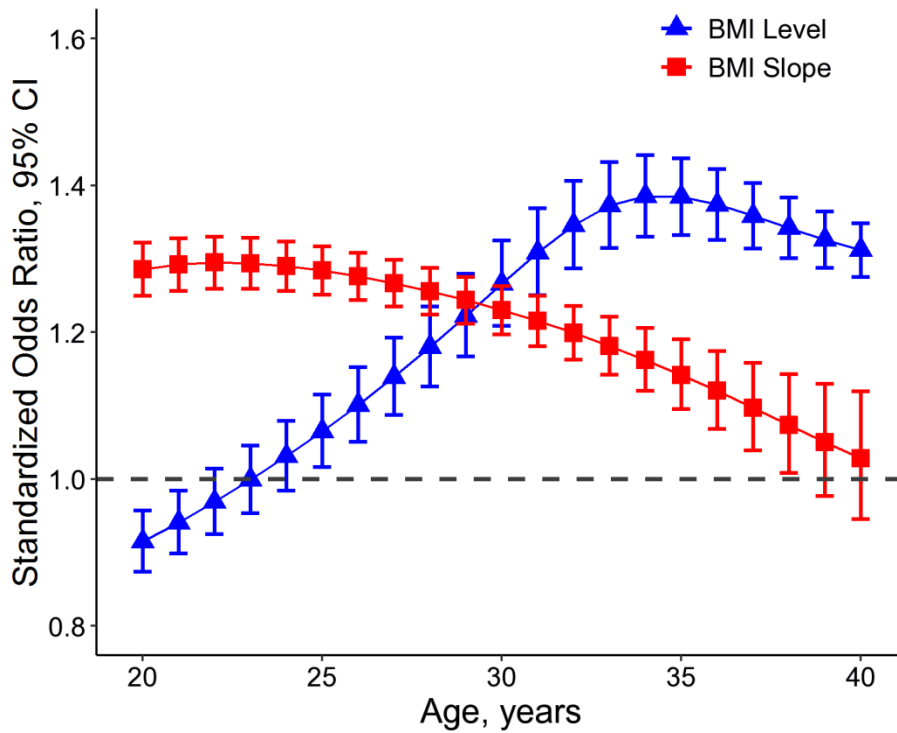

Supplement: JAH3-8-e011937-s001.pdf [file JAH3-8-e011937-s001.pdf]
